# Supplementary material for: HIF-1α and HIF-2α differently regulate tumour development and inflammation of clear cell renal cell carcinoma in mice
Source: PubMed Central journal article supplement (PMC7431415; doi:10.1038/s41467-020-17873-3), 2020-08-17
Supplement: 41467_2020_17873_MOESM3_ESM.pdf [file 41467_2020_17873_MOESM3_ESM.pdf]

## **Description of additional supplementary files**

### **Supplementary Data 1**

**Description:** RNA sequencing

### **Supplementary Data 2**

**Description:** GAGE analyses

### **Supplementary Data 3**

**Description:** Proteomic analyses

### **Supplementary Data 4**

**Description:** Correlation analyses of expression of HIF2A and antigen presentation machinery

### **Supplementary Data 5**

**Description:** Summary of gene signatures used for ssGSEA immune cell deconvolution Seite 5/6

### **Supplementary Data 6**

**Description:** Immune cell deconvolution z-scores and P-values for Figs. 6a and 7n
